# Supplementary material for: Protection against Paraquat-Induced Oxidative Stress by Curcuma longa Extract-Loaded Polymeric Nanoparticles in Zebrafish Embryos
Source: MDPI journal article supplement (doi:10.3390/polym14183773), 2022-09-09
Supplement: s1 [file s1]

## SUPPLEMENTARY MATERIAL

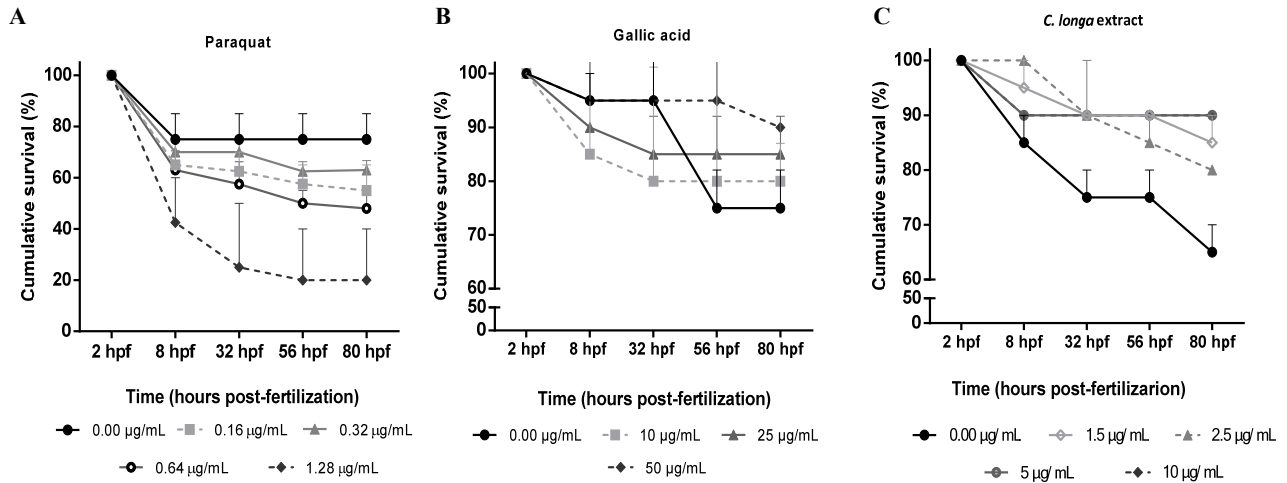

**Figure S1.** Effects of (A) paraquat; (B) gallic acid and (C) *Curcuma longa* extract on zebrafish embryos at different hours post-fertilization (h<sub>pf</sub>). Results are expressed as mean  $\pm$  SD. Chi-square test at 80 h<sub>pf</sub> for: paraquat -  $\chi^2=35.26$ ,  $P<0.05$ ; *C. longa* extract -  $\chi^2=23.889$ ,  $P<0.001$  and gallic acid -  $\chi^2=7.143$ ,  $P=0.067$ .

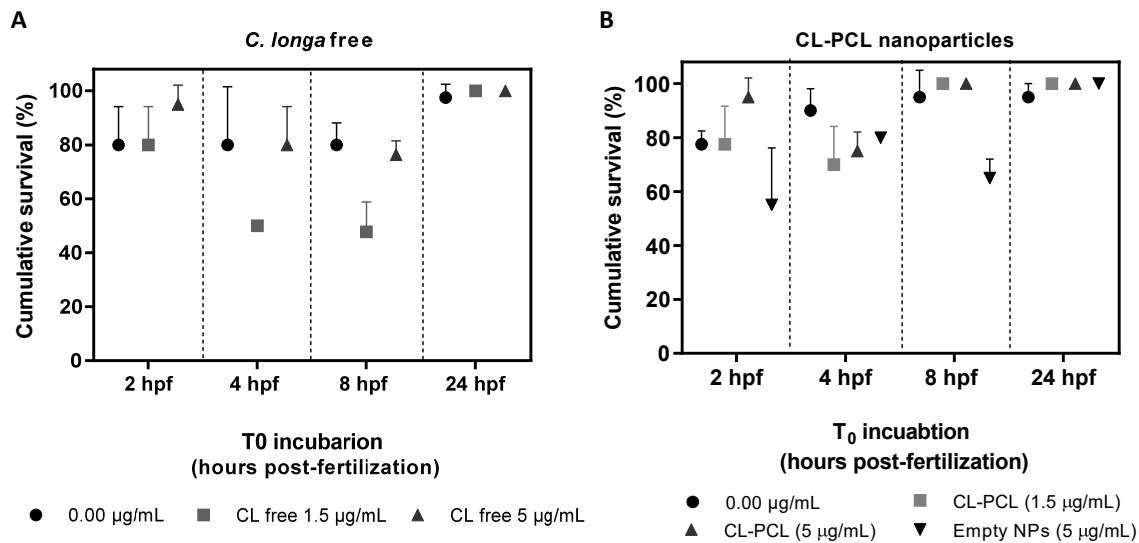

**Figure S2.** Short exposure effect of *Curcuma longa* extract (CL) free (A) and loaded to poly-ε-caprolactone nanoparticles (CL-PCL NPs) (B), on survival of zebrafish embryos. 1.5 and 5 µg/mL were the range of concentrations tested. 2, 4, 8 and 24 hours post-fertilization (h<sub>pf</sub>) were the incubation times. Results are expressed as mean  $\pm$  SD. Chi square test for CL free: 2 h<sub>pf</sub>:  $\chi^2=42.000$ ,  $P<0.001$ ; 4 h<sub>pf</sub>:  $\chi^2=20.000$ ,  $P<0.001$ ; 8 h<sub>pf</sub>:  $\chi^2=19.494$ ,  $P<0.001$ ; 24 h<sub>pf</sub>:  $\chi^2=5.000$ ,  $P=0.082$ . Chi square test for CL-PCL NPs: chi square test; 2 h<sub>pf</sub>:  $\chi^2=97.500$ ,  $P<0.001$ ; 4 h<sub>pf</sub>:  $\chi^2=10.294$ ,  $P<0.05$ ; 8 h<sub>pf</sub>:  $\chi^2=85.000$ ,  $P<0.001$ ; 24 h<sub>pf</sub>:  $\chi^2=5.000$ ,  $P=0.082$ .

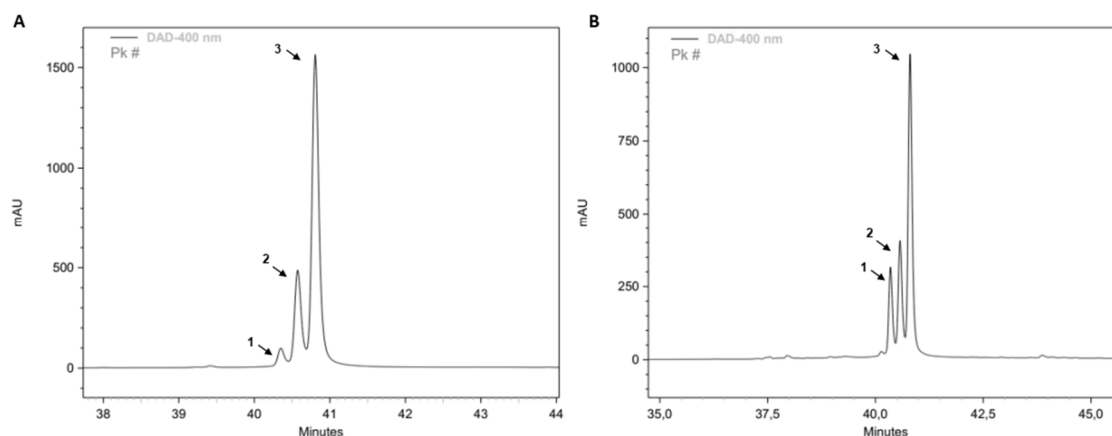

**Figure S3:** Detailed analysis of high-performance liquid chromatography (HPLC) analysis of commercial standard curcumin (A) and *Curcuma longa* (CL) methanolic extract (B) relating to the period between 38 and 44 min, clearly showing the major compounds present were curcumin (3), demethoxycurcumin (2) and bisdemethoxycurcumin (1).

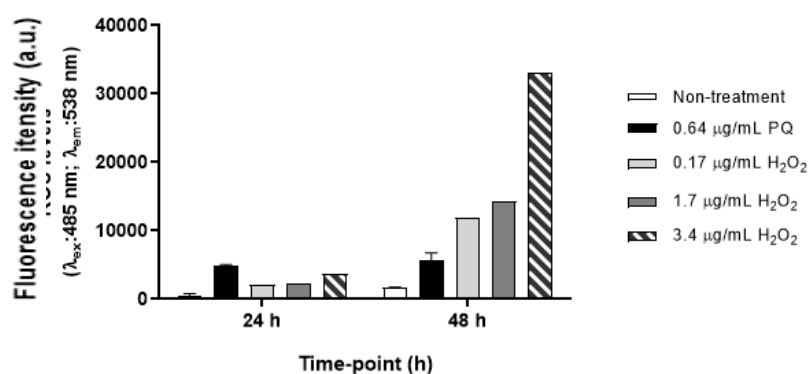

**Figure S4.** Titration of reactive oxygen species (ROS) induced by paraquat (PQ) and hydrogen peroxide ( $\text{H}_2\text{O}_2$ ) exposure on zebrafish embryos. At 2 h<sub>pf</sub>, the embryos were exposed to 0.64  $\mu\text{g/mL}$  of PQ or 0.17 – 3.4  $\mu\text{g/mL}$  of  $\text{H}_2\text{O}_2$  for 24 h and, after this incubation time, the media were replaced by freshwater. ROS levels were quantified with DCFH-DA probe (excitation wavelength 485 nm and emission wavelength 538 nm), measured 24 h after incubation (time-point 24 h) and one day after its removal (time-point 48 h).

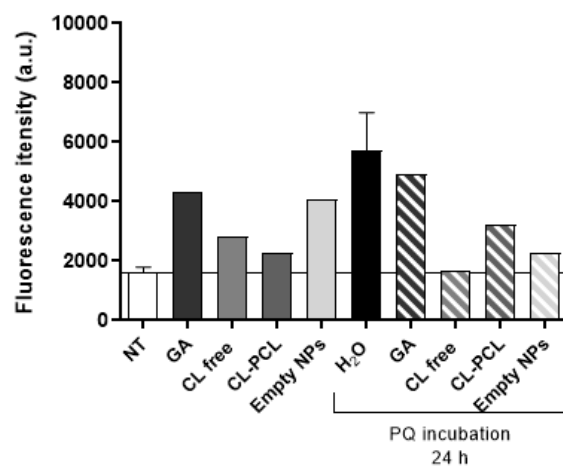

**Figure S5.** The effects of *Curcuma longa* extract (CL) exposure on paraquat (PQ)-induced ROS generation in zebrafish embryos. Zebrafish embryos were exposed to PQ for 24 h and treated with CL free, CL-poly- $\epsilon$ -caprolactone (CL-PCL) nanoparticles and gallic acid (GA). The concentrations tested were: 0.64  $\mu\text{g/mL}$  PQ; 5  $\mu\text{g/mL}$  CL free, CL-PCL and empty NPs and 25  $\mu\text{g/mL}$  of GA. ROS measurement was performed one day after PQ removal (time-point 48 h).

**Table S1.** Zebrafish embryotoxicity test – short exposure toxicity assessment. (+) stands for statistically significant effect and (-) for non-statistically significant effect. h<sub>pf</sub>, hours post-fertilization; CL Free, *Curcuma longa* extract and CL-PCL NPs, *Curcuma longa* extract - poly-ε-caprolactone nanoparticles.

| Independent variables   |                       | h <sub>pf</sub> | CL Free<br>(1.5 µg/mL) | CL-PCL NPs<br>(1.5µg/mL) |
|-------------------------|-----------------------|-----------------|------------------------|--------------------------|
| Morphometric parameters | Yolk volume           | 2               | +                      | -                        |
|                         |                       | 4               | +                      | -                        |
|                         |                       | 8               | -                      | -                        |
|                         |                       | 24              | -                      | -                        |
|                         | Head-trunk index      | 2               | -                      | -                        |
|                         |                       | 4               | -                      | +                        |
|                         |                       | 8               | -                      | -                        |
|                         |                       | 24              | -                      | -                        |
|                         | Pupil surface         | 2               | -                      | -                        |
|                         |                       | 4               | -                      | -                        |
|                         |                       | 8               | -                      | -                        |
|                         |                       | 24              | +                      | -                        |
| Neuro-motor parameters  | Cardiac frequency     | 2               | -                      | -                        |
|                         |                       | 4               | -                      | +                        |
|                         |                       | 8               | -                      | +                        |
|                         |                       | 24              | -                      | +                        |
|                         | Spontaneous movements | 2               | +                      | -                        |
|                         |                       | 4               | -                      | -                        |
|                         |                       | 8               | -                      | -                        |
|                         |                       | 24              | -                      | -                        |

**Table S2.** Zebrafish embryotoxicity test - post-incubation experiment. (+) stands for statistically significant effect and (-) for non-statistically significant effect. GA [25] - gallic acid 25 µg/mL; GA [50] - gallic acid 50 µg/mL; PQ - paraquat (0.64 µg/mL).

| Independent variables   |                       |    | Post-incubation conditions |         |                             |                    |                    |
|-------------------------|-----------------------|----|----------------------------|---------|-----------------------------|--------------------|--------------------|
|                         |                       |    | GA [25]                    | GA [50] | PQ<br>↓<br>H <sub>2</sub> O | PQ<br>↓<br>GA [25] | PQ<br>↓<br>GA [50] |
| Morphometric parameters | Epibolic arc          | 8  | -                          | -       | -                           | -                  | -                  |
|                         | Yolk volume           | 8  | -                          | -       | -                           | -                  | -                  |
|                         | Head-trunk index      | 32 | -                          | -       | -                           | -                  | +                  |
|                         | Yolk volume           | 32 | -                          | +       | -                           | -                  | -                  |
|                         | Pupil surface         | 32 | -                          | -       | -                           | -                  | -                  |
|                         | Yolk volume           | 56 | -                          | +       | -                           | -                  | -                  |
|                         | Eye surface           | 56 | -                          | -       | -                           | -                  | -                  |
| Neuro-motor parameters  | Spontaneous movements | 32 | +                          | +       | +                           | +                  | -                  |
|                         | Cardiac frequency     | 56 | -                          | -       | +                           | +                  | +                  |
|                         | Free-swimming         | 80 | -                          | -       | -                           | -                  | -                  |
| Cumulative survival     | Survival              | 80 | -                          | -       | +                           | -                  | -                  |
